# Supplementary material for: Genetic Relationships and Signatures of Adaptation to the Climatic Conditions in Populations of <em>Apis cerana</em> Based on the Polymorphism of the Gene Vitellogenin
Source: Preprints.org preprint supplement (doi:10.20944/preprints202209.0434.v1), 2022-09-28
Supplement: Supplementary file 1 [file Supplementary material.doc]

**Supplementary data**

**Table S1. The accession numbers of the gene *VG* exons of *A. cerana* honey bees submitted to the** GenBank

| No. | Samples | GenBank accession numbers of the gene *VG* exons (2-7) |
| --- | --- | --- |
| 1. | *A._cerana*,_Gangneung,_Korea_01 | MH755718, MH755753, MH755788, MH755823, MH755858, MH755893 |
| 2. | *A._cerana*,_Gangneung,_Korea_02 | MH755719, MH755754, MH755789, MH755824, MH755859, MH755894 |
| 3. | *A._cerana*,_Gangneung,_Korea_03 | MH755720, MH755755, MH755790, MH755825, MH755860, MH755895 |
| 4. | *A._cerana*,_Goseong,_Korea_01 | MH755733, MH755768, MH755803, MH755838, MH755873, MH755908 |
| 5. | *A._cerana*,_Hiroshima,_Japan_01 | MH755739, MH755774, MH755809, MH755844, MH755879, MH755914 |
| 6. | *A._cerana*,_Hiroshima,_Japan_02 | MH755740, MH755775, MH755810, MH755845, MH755880, MH755915 |
| 7. | *A._cerana*,_Hongcheon,_Korea_01 | MH755717, MH755752, MH755787, MH755822, MH755857, MH755892 |
| 8. | *A._cerana*,_Icheon,_Korea_01 | MH755714, MH755749, MH755784, MH755819, MH755854, MH755889 |
| 9. | *A._cerana*,_Icheon,_Korea_02 | MH755715, MH755750, MH755785, MH755820, MH755855, MH755890 |
| 10. | *A._cerana*,_Icheon,_Korea_03 | MH755716, MH755751, MH755786, MH755821, MH755856, MH755891 |
| 11. | *A._cerana*,_Kathmandu,_Nepal_01 | MH755743, MH755778, MH755813, MH755848, MH755883, MH755918 |
| 12. | *A._cerana*,_Kathmandu,_Nepal_02 | MH755744, MH755779, MH755814, MH755849, MH755884, MH755919 |
| 13. | *A._cerana*,_Kitahiroshima,_Japan_01 | MH755741, MH755776, MH755811, MH755846, MH755881, MH755916 |
| 14. | *A._cerana*,_Kitahiroshima,_Japan_02 | MH755742, MH755777, MH755812, MH755847, MH755882, MH755917 |
| 15. | *A._cerana*,_Okcheon,_Korea_01 | MH755723, MH755758, MH755793, MH755828, MH755863, MH755898 |
| 16. | *A._cerana*,_Okcheon,_Korea_02 | MH755724, MH755759, MH755794, MH755829, MH755864, MH755899 |
| 17. | *A._cerana*,_Okcheon,_Korea_03 | MH755725, MH755760, MH755795, MH755830, MH755865, MH755900 |
| 18. | *A._cerana*,_Samcheok,_Korea_01 | MH755721, MH755756, MH755791, MH755826, MH755861, MH755896 |
| 19. | *A._cerana*,_Samcheok,_Korea_02 | MH755722, MH755757, MH755792, MH755827, MH755862, MH755897 |
| 20. | *A._cerana*,_Sancheong,_Korea_01 | MH755734, MH755769, MH755804, MH755839, MH755874, MH755909 |
| 21. | *A._cerana*,_Sancheong,_Korea_02 | MH755735, MH755770, MH755805, MH755840, MH755875, MH755910 |
| 22. | *A._cerana*,_Sancheong,_Korea_03 | MH755736, MH755771, MH755806, MH755841, MH755876, MH755911 |
| 23. | *A._cerana*,_Sangju,_Korea_01 | MH755726, MH755761, MH755796, MH755831, MH755866, MH755901 |
| 24. | *A._cerana*,_Sangju,_Korea_02 | MH755727, MH755762, MH755797, MH755832, MH755867, MH755902 |
| 25. | *A._cerana*,_Sangju,_Korea_03 | MH755728, MH755763, MH755798, MH755833, MH755868, MH755903 |
| 26. | *A._cerana*,_Taiwan,_China_01 | MH755747, MH755782, MH755817, MH755852, MH755887, MH755922 |
| 27. | *A._cerana*,_Taiwan,_China_02 | MH755748, MH755783, MH755818, MH755853, MH755888, MH755923 |
| 28. | *A._cerana*,_Uisung,_Korea_01 | MH755729, MH755764, MH755799, MH755834, MH755869, MH755904 |
| 29. | *A._cerana*,_Uisung,_Korea_02 | MH755730, MH755765, MH755800, MH755835, MH755870, MH755905 |
| 30. | *A._cerana*,_Uisung,_Korea_03 | MH755731, MH755766, MH755801, MH755836, MH755871, MH755906 |
| 31. | *A._cerana*,_Vladivostok,_Russia_01 | MH755745, MH755780, MH755815, MH755850, MH755885, MH755920 |
| 32. | *A._cerana*,_Vladivostok,_Russia_02 | MH755746, MH755781, MH755816, MH755851, MH755886, MH755921 |
| 33. | *A._cerana*,_Wanju,_Korea_01 | MH755732, MH755767, MH755802, MH755837, MH755872, MH755907 |
| 34. | *A._mellifera*,_Tamil_Nadu,_India_01 | MH755737, MH755772, MH755807, MH755842, MH755877, MH755912 |
| 35. | *A._mellifera*,_Tamil_Nadu,_India_02 | MH755738, MH755773, MH755808, MH755843, MH755878, MH755913 |
| Sequences of the gene *VG* exons (2-7) retrieved from the GenBank | | |
| 36 | *A._cerana*,_ACSNU-2.0_Seoul,_Korea_01 | ACSNU-2.0, PRJNA235974, NW_016017501 compl(417059..423214) |
| 37 | *A._cerana*,_*Apis*CC1.0_Jiangxi,_China_01 | ApisCC1.0, PRJNA239323, KZ288206 (781683-788045) |
| 38 | *A._cerana*,_*Apis*cer_1.0_Kyoto,_Japan_01 | Apiscer_1.0, PRJDB5799, BDUG01002346 (114156-120605) |
| 39 | *A._cerana*,_KP119837_Yunnan,_China_01 | KP119837 |
| 40 | *A._cerana*,_KP398512_Beijing,_China_01 | KP398512 |
| 41 | *A._cerana*,_KT725235_Yunnan,_China_02 | KT725235 |
| 42 | *A._cerana*,_NM_001328484_Beijing,_China_02 | NM_001328484 |
| 43 | *A._mellifera*,_M2161,_Warsaw,_Poland_01 | JN557285, JN557377, JN557191, JN557563, JN557471, JN557099 |

**Table S2. The number of nucleotide differences (transitions + transversions) between *A. cerana* local populations and *A. mellifera* outgroups based on exon sequences of the gene *VG* below the diagonal and its standard error (S.E.) above the diagonal**

|  |  | **1** | **2** | **3** | **4** | **5** | **6** | **7** | **8** | **9** | **10** | **11** | 12 | 13 | 14 | 15 | 16 | 17 | 18 | 19 | 20 | 21 |
| --- | --- | --- | --- | --- | --- | --- | --- | --- | --- | --- | --- | --- | --- | --- | --- | --- | --- | --- | --- | --- | --- | --- |
|  |  | Standard error S.E. | | | | | | | | | | | | | | | | | | | | |
| **1*** | Number of nucleotide differences (tr + tv) |  | **3.4** | **3.6** | **2.7** | **2.7** | **3.0** | **4.0** | **3.0** | **3.4** | **3.8** | **3.2** | 2.9 | 3.9 | 4.8 | 4.7 | 4.3 | 4.6 | 4.5 | 4.6 | 5.6 | 6.6 |
| **2** | **17** |  | **3.4** | **3.5** | **3.1** | **4.3** | **4.9** | **3.3** | **2.4** | **2.5** | **4.2** | 3.5 | 3.5 | 4.2 | 4.9 | 5.2 | 4.2 | 4.2 | 3.8 | 6.9 | 6.7 |
| **3** | **17** | **10** |  | **3.9** | **3.4** | **4.7** | **5.1** | **3.5** | **3.0** | **2.6** | **4.8** | 4.1 | 3.7 | 4.8 | 5.3 | 5.5 | 4.8 | 5.0 | 4.8 | 6.9 | 7.3 |
| **4** | **12** | **14** | **13** |  | **2.4** | **3.3** | **4.9** | **3.1** | **2.6** | **3.7** | **4.1** | 3.0 | 3.3 | 4.8 | 4.7 | 4.9 | 4.5 | 4.3 | 4.0 | 5.9 | 6.8 |
| **5** | **13** | **13** | **16** | **12** |  | **2.8** | **3.6** | **3.3** | **2.6** | **3.0** | **3.2** | 3.0 | 3.1 | 3.8 | 4.3 | 4.1 | 4.2 | 3.7 | 4.3 | 5.5 | 6.7 |
| **6** | **15** | **21** | **20** | **15** | **15** |  | **3.1** | **3.5** | **3.8** | **4.0** | **4.0** | 3.2 | 4.2 | 4.2 | 4.8 | 4.8 | 4.7 | 4.6 | 5.1 | 5.7 | 6.8 |
| **7** | **17** | **24** | **26** | **19** | **16** | **16** |  | **4.2** | **4.6** | **4.8** | **4.1** | 4.6 | 4.1 | 5.7 | 4.7 | 4.2 | 4.6 | 4.4 | 5.4 | 5.5 | 6.9 |
| **8** | **16** | **15** | **17** | **17** | **16** | **20** | **21** |  | **3.5** | **3.3** | **4.1** | 3.1 | 3.8 | 4.4 | 4.7 | 4.7 | 4.7 | 4.5 | 4.7 | 6.4 | 7.2 |
| **9** | **18** | **11** | **13** | **12** | **14** | **18** | **27** | **20** |  | **2.7** | **4.2** | 4.1 | 3.1 | 3.9 | 4.4 | 4.3 | 4.1 | 3.7 | 4.1 | 6.3 | 6.3 |
| **10** | **21** | **12** | **13** | **18** | **17** | **22** | **28** | **20** | **15** |  | **4.6** | 3.8 | 3.8 | 3.1 | 4.7 | 5.0 | 4.6 | 4.1 | 4.5 | 6.8 | 7.1 |
| **11** | **14** | **20** | **24** | **16** | **14** | **18** | **13** | **20** | **20** | **24** |  | 4.3 | 4.5 | 6.1 | 4.6 | 4.6 | 4.8 | 4.3 | 4.9 | 4.8 | 6.8 |
| 12 | 16 | 16 | 17 | 15 | 16 | 19 | 23 | 19 | 19 | 27 | 21 |  | 4.4 | 4.7 | 5.4 | 5.5 | 4.9 | 4.7 | 4.8 | 5.9 | 7.4 |
| 13 | 22 | 22 | 22 | 20 | 20 | 24 | 25 | 27 | 19 | 25 | 22 | 24 |  | 4.1 | 4.8 | 4.5 | 4.3 | 4.1 | 4.2 | 6.6 | 6.3 |
| 14 | 26 | 20 | 18 | 23 | 22 | 19 | 34 | 26 | 18 | 16 | 32 | 25 | 23 |  | 4.9 | 5.2 | 5.2 | 4.8 | 5.4 | 7.9 | 6.7 |
| 15 | 40 | 36 | 39 | 36 | 35 | 38 | 37 | 42 | 33 | 37 | 38 | 43 | 38 | 39 |  | 4.4 | 4.2 | 3.4 | 4.4 | 6.5 | 6.9 |
| 16 | 28 | 27 | 29 | 26 | 24 | 28 | 25 | 32 | 22 | 29 | 27 | 32 | 26 | 29 | 36 |  | 4.7 | 4.2 | 5.0 | 6.3 | 5.2 |
| 17 | 35 | 32 | 32 | 30 | 32 | 35 | 33 | 39 | 29 | 34 | 33 | 35 | 33 | 39 | 36 | 36 |  | 3.7 | 4.2 | 6.1 | 6.9 |
| 18 | 29 | 24 | 27 | 26 | 25 | 26 | 26 | 31 | 22 | 27 | 27 | 32 | 28 | 29 | 27 | 29 | 29 |  | 4.5 | 6.6 | 6.1 |
| 19 | 29 | 22 | 27 | 27 | 28 | 31 | 32 | 33 | 24 | 30 | 30 | 29 | 27 | 32 | 34 | 33 | 30 | 28 |  | 7.3 | 6.9 |
| 20 | 36 | 46 | 45 | 40 | 38 | 38 | 32 | 44 | 43 | 49 | 33 | 40 | 40 | 52 | 61 | 49 | 55 | 50 | 52 |  | 7.9 |
| 21 | 259 | 253 | 255 | 252 | 254 | 258 | 254 | 269 | 258 | 256 | 256 | 260 | 253 | 258 | 260 | 252 | 258 | 249 | 261 | 270 |  |

**Notes**: 1. *A. cerana*, Gangneung, Korea, 2. *A. cerana*, Goseong, Korea, 3. *A. cerana*, Hongcheon, Korea, 4. *A. cerana*, Samcheok, Korea, 5. *A. cerana*, Sancheong, Korea, 6. *A. cerana*, Sangju, Korea, 7. *A. cerana*, Seoul, Korea, 8. *A. cerana*, Icheon, Korea, 9. *A. cerana*, Okcheon, Korea, 10. *A. cerana*, Uisung, Korea, 11. *A. cerana*, Wanju, Korea, 12. *A. cerana*, Hiroshima, Japan, 13. *A. cerana*, Kitahiroshima, Japan, 14. *A. cerana*, Kyoto, Japan, 15. *A. cerana*, Beijing, China, 16. *A. cerana*, Jiangxi, China, 17. *A. cerana*, Taiwan, China, 18. *A. cerana*, Yunnan, China, 19. *A. cerana*, Kathmandu, Nepal, 20. *A. cerana*, Vladivostok, Russia, 21. *A. mellifera*, Out group. * The Korean samples of *A. cerana* are indicated in bold.

**Table S3. The ratio of non-synonymous to synonymous substitutions (dN/dS) between local populations of *A. cerana* and outgroup *A. mellifera* based on the exon sequences of the gene *VG* below the diagonal and its standard error (S.E.) above the diagonal**

|  |  | **1** | **2** | **3** | **4** | **5** | **6** | **7** | **8** | **9** | **10** | **11** | 12 | 13 | 14 | 15 | 16 | 17 | 18 | 19 | 20 | 21 |
| --- | --- | --- | --- | --- | --- | --- | --- | --- | --- | --- | --- | --- | --- | --- | --- | --- | --- | --- | --- | --- | --- | --- |
|  |  | Standard error S.E. | | | | | | | | | | | | | | | | | | | | |
| **1*** | dN/dS ratio |  | **0.003** | **0.002** | **0.002** | **0.002** | **0.002** | **0.002** | **0.002** | **0.002** | **0.002** | **0.002** | 0.002 | 0.003 | 0.003 | 0.003 | 0.003 | 0.004 | 0.002 | 0.003 | 0.003 | 0.010 |
| **2** | **0.370** |  | **0.002** | **0.003** | **0.002** | **0.003** | **0.004** | **0.002** | **0.002** | **0.001** | **0.003** | 0.003 | 0.003 | 0.003 | 0.004 | 0.004 | 0.004 | 0.003 | 0.003 | 0.004 | 0.010 |
| **3** | **0.314** | **0.473** |  | **0.002** | **0.002** | **0.003** | **0.003** | **0.002** | **0.002** | **0.002** | **0.004** | 0.002 | 0.002 | 0.002 | 0.003 | 0.003 | 0.004 | 0.003 | 0.003 | 0.004 | 0.010 |
| **4** | **0.384** | **0.292** | **0.247** |  | **0.002** | **0.003** | **0.003** | **0.002** | **0.001** | **0.002** | **0.002** | 0.002 | 0.002 | 0.003 | 0.003 | 0.003 | 0.004 | 0.002 | 0.003 | 0.004 | 0.010 |
| **5** | **0.398** | **0.385** | **0.441** | **0.343** |  | **0.002** | **0.002** | **0.002** | **0.001** | **0.002** | **0.002** | 0.002 | 0.002 | 0.002 | 0.003 | 0.003 | 0.004 | 0.002 | 0.003 | 0.003 | 0.010 |
| **6** | **0.609** | **0.382** | **0.446** | **0.337** | **0.394** |  | **0.002** | **0.002** | **0.002** | **0.003** | **0.003** | 0.002 | 0.003 | 0.003 | 0.004 | 0.004 | 0.004 | 0.003 | 0.004 | 0.002 | 0.010 |
| **7** | **0.384** | **0.315** | **0.367** | **0.518** | **0.315** | **0.509** |  | **0.002** | **0.003** | **0.003** | **0.004** | 0.003 | 0.003 | 0.004 | 0.004 | 0.004 | 0.004 | 0.003 | 0.004 | 0.003 | 0.010 |
| **8** | **0.410** | **0.362** | **0.415** | **0.489** | **0.422** | **0.547** | **0.512** |  | **0.002** | **0.002** | **0.002** | 0.002 | 0.003 | 0.003 | 0.003 | 0.003 | 0.004 | 0.002 | 0.003 | 0.002 | 0.010 |
| **9** | **0.625** | **0.379** | **0.583** | **0.546** | **0.476** | **0.491** | **0.454** | **0.584** |  | **0.002** | **0.003** | 0.002 | 0.002 | 0.002 | 0.003 | 0.003 | 0.002 | 0.002 | 0.003 | 0.003 | 0.010 |
| **10** | **0.474** | **0.695** | **0.821** | **0.422** | **0.517** | **0.382** | **0.385** | **0.482** | **0.502** |  | **0.003** | 0.002 | 0.002 | 0.002 | 0.003 | 0.003 | 0.004 | 0.002 | 0.003 | 0.004 | 0.010 |
| **11** | **0.408** | **0.433** | **0.409** | **0.829** | **0.299** | **0.328** | **0.158** | **0.488** | **0.614** | **0.439** |  | 0.003 | 0.003 | 0.004 | 0.004 | 0.004 | 0.004 | 0.003 | 0.004 | 0.004 | 0.010 |
| 12 | 0.439 | 0.295 | 0.334 | 0.236 | 0.365 | 0.451 | 0.394 | 0.431 | 0.397 | 0.435 | 0.453 |  | 0.003 | 0.003 | 0.004 | 0.004 | 0.004 | 0.003 | 0.003 | 0.003 | 0.010 |
| 13 | 0.309 | 0.403 | 0.609 | 0.394 | 0.321 | 0.310 | 0.229 | 0.418 | 0.473 | 0.549 | 0.272 | 0.315 |  | 0.002 | 0.003 | 0.003 | 0.003 | 0.003 | 0.003 | 0.004 | 0.010 |
| 14 | 0.446 | 0.433 | 0.999 | 0.300 | 0.393 | 0.226 | 0.334 | 0.388 | 0.370 | 0.473 | 0.359 | 0.507 | 0.609 |  | 0.003 | 0.003 | 0.004 | 0.003 | 0.003 | 0.004 | 0.010 |
| 15 | 0.500 | 0.487 | 0.560 | 0.569 | 0.478 | 0.406 | 0.354 | 0.506 | 0.498 | 0.470 | 0.451 | 0.449 | 0.424 | 0.373 |  | 0.004 | 0.003 | 0.002 | 0.002 | 0.004 | 0.010 |
| 16 | 0.452 | 0.457 | 0.513 | 0.486 | 0.476 | 0.390 | 0.289 | 0.529 | 0.484 | 0.527 | 0.428 | 0.446 | 0.327 | 0.485 | 0.377 |  | 0.004 | 0.003 | 0.004 | 0.004 | 0.010 |
| 17 | 0.463 | 0.403 | 0.459 | 0.543 | 0.479 | 0.404 | 0.377 | 0.514 | 0.467 | 0.451 | 0.459 | 0.362 | 0.392 | 0.387 | 0.637 | 0.391 |  | 0.003 | 0.003 | 0.005 | 0.010 |
| 18 | 0.581 | 0.572 | 0.690 | 0.670 | 0.539 | 0.457 | 0.328 | 0.566 | 0.594 | 0.512 | 0.457 | 0.485 | 0.489 | 0.380 | 0.474 | 0.350 | 0.551 |  | 0.002 | 0.004 | 0.010 |
| 19 | 0.524 | 0.455 | 0.535 | 0.580 | 0.548 | 0.489 | 0.405 | 0.525 | 0.514 | 0.515 | 0.515 | 0.501 | 0.489 | 0.498 | 0.947 | 0.376 | 0.867 | 0.820 |  | 0.005 | 0.010 |
| 20 | 0.643 | 0.578 | 0.557 | 0.711 | 0.642 | 0.846 | 0.798 | 0.699 | 0.758 | 0.598 | 0.645 | 0.698 | 0.582 | 0.619 | 0.575 | 0.579 | 0.538 | 0.629 | 0.690 |  | 0.010 |
| 21 | 0.520 | 0.511 | 0.538 | 0.537 | 0.521 | 0.507 | 0.496 | 0.524 | 0.524 | 0.524 | 0.523 | 0.504 | 0.514 | 0.514 | 0.497 | 0.511 | 0.502 | 0.513 | 0.520 | 0.500 |  |

**Notes**: 1. *A. cerana*, Gangneung, Korea, 2. *A. cerana*, Goseong, Korea, 3. *A. cerana*, Hongcheon, Korea, 4. *A. cerana*, Samcheok, Korea, 5. *A. cerana*, Sancheong, Korea, 6. *A. cerana*, Sangju, Korea, 7. *A. cerana*, Seoul, Korea, 8. *A. cerana*, Icheon, Korea, 9. *A. cerana*, Okcheon, Korea, 10. *A. cerana*, Uisung, Korea, 11. *A. cerana*, Wanju, Korea, 12. *A. cerana*, Hiroshima, Japan, 13. *A. cerana*, Kitahiroshima, Japan, 14. *A. cerana*, Kyoto, Japan, 15. *A. cerana*, Beijing, China, 16. *A. cerana*, Jiangxi, China, 17. *A. cerana*, Taiwan, China, 18. *A. cerana*, Yunnan, China, 19. *A. cerana*, Kathmandu, Nepal, 20. *A. cerana*, Vladivostok, Russia, 21. *A. mellifera*, Out group. *The Korean samples of *A. cerana* are indicated in bold.

**Table S4. The** **Jukes-Cantor genetic distances between local populations of *A. cerana* and outgroup *A. mellifera* based on the exon sequences of the gene *VG* below the diagonal and its standard error (S.E.) above the diagonal**

|  |  | **1** | **2** | **3** | **4** | **5** | **6** | **7** | **8** | **9** | **10** | **11** | 12 | 13 | 14 | 15 | 16 | 17 | 18 | 19 | 20 | 21 |
| --- | --- | --- | --- | --- | --- | --- | --- | --- | --- | --- | --- | --- | --- | --- | --- | --- | --- | --- | --- | --- | --- | --- |
|  |  | Standard error S.E. | | | | | | | | | | | | | | | | | | | | |
| **1*** | Jukes-Cantor genetic distances |  | **0.001** | **0.001** | **0.001** | **0.001** | **0.001** | **0.001** | **0.001** | **0.001** | **0.001** | **0.001** | 0.001 | 0.001 | 0.001 | 0.001 | 0.001 | 0.001 | 0.001 | 0.001 | 0.001 | 0.004 |
| **2** | **0.004** |  | **0.001** | **0.001** | **0.001** | **0.001** | **0.001** | **0.001** | **0.001** | **0.001** | **0.001** | 0.001 | 0.001 | 0.001 | 0.001 | 0.002 | 0.001 | 0.001 | 0.001 | 0.001 | 0.001 |
| **3** | **0.004** | **0.002** |  | **0.001** | **0.001** | **0.001** | **0.001** | **0.001** | **0.001** | **0.001** | **0.001** | 0.001 | 0.001 | 0.001 | 0.001 | 0.002 | 0.001 | 0.001 | 0.001 | 0.002 | 0.005 |
| **4** | **0.003** | **0.003** | **0.003** |  | **0.001** | **0.001** | **0.001** | **0.001** | **0.001** | **0.001** | **0.001** | 0.001 | 0.001 | 0.001 | 0.001 | 0.001 | 0.001 | 0.001 | 0.001 | 0.001 | 0.004 |
| **5** | **0.003** | **0.003** | **0.004** | **0.003** |  | **0.001** | **0.001** | **0.001** | **0.001** | **0.001** | **0.001** | 0.001 | 0.001 | 0.001 | 0.001 | 0.001 | 0.001 | 0.001 | 0.001 | 0.001 | 0.004 |
| **6** | **0.004** | **0.005** | **0.005** | **0.004** | **0.004** |  | **0.001** | **0.001** | **0.001** | **0.001** | **0.001** | 0.001 | 0.001 | 0.001 | 0.001 | 0.001 | 0.001 | 0.001 | 0.001 | 0.001 | 0.004 |
| **7** | **0.004** | **0.006** | **0.006** | **0.005** | **0.004** | **0.004** |  | **0.001** | **0.001** | **0.001** | **0.001** | 0.001 | 0.001 | 0.001 | 0.001 | 0.001 | 0.001 | 0.001 | 0.001 | 0.001 | 0.005 |
| **8** | **0.004** | **0.004** | **0.004** | **0.004** | **0.004** | **0.005** | **0.005** |  | **0.001** | **0.001** | **0.001** | 0.001 | 0.001 | 0.001 | 0.001 | 0.001 | 0.001 | 0.001 | 0.001 | 0.002 | 0.005 |
| **9** | **0.005** | **0.003** | **0.003** | **0.003** | **0.003** | **0.004** | **0.005** | **0.005** |  | **0.001** | **0.001** | 0.001 | 0.001 | 0.001 | 0.001 | 0.001 | 0.001 | 0.001 | 0.001 | 0.002 | 0.004 |
| **10** | **0.005** | **0.003** | **0.003** | **0.005** | **0.004** | **0.005** | **0.007** | **0.005** | **0.004** |  | **0.001** | 0.001 | 0.001 | 0.001 | 0.001 | 0.001 | 0.001 | 0.001 | 0.001 | 0.002 | 0.005 |
| **11** | **0.003** | **0.005** | **0.006** | **0.004** | **0.003** | **0.004** | **0.003** | **0.005** | **0.005** | **0.006** |  | 0.001 | 0.001 | 0.002 | 0.001 | 0.002 | 0.001 | 0.001 | 0.001 | 0.001 | 0.004 |
| 12 | 0.004 | 0.004 | 0.004 | 0.004 | 0.004 | 0.005 | 0.006 | 0.005 | 0.005 | 0.005 | 0.005 |  | 0.001 | 0.001 | 0.002 | 0.002 | 0.001 | 0.001 | 0.001 | 0.001 | 0.005 |
| 13 | 0.005 | 0.005 | 0.005 | 0.005 | 0.005 | 0.006 | 0.005 | 0.007 | 0.005 | 0.006 | 0.005 | 0.006 |  | 0.001 | 0.001 | 0.001 | 0.001 | 0.001 | 0.001 | 0.001 | 0.005 |
| 14 | 0.006 | 0.005 | 0.004 | 0.006 | 0.005 | 0.005 | 0.009 | 0.006 | 0.004 | 0.004 | 0.008 | 0.006 | 0.006 |  | 0.001 | 0.001 | 0.001 | 0.001 | 0.001 | 0.002 | 0.005 |
| 15 | 0.010 | 0.009 | 0.010 | 0.009 | 0.009 | 0.009 | 0.009 | 0.010 | 0.008 | 0.009 | 0.009 | 0.010 | 0.010 | 0.010 |  | 0.001 | 0.001 | 0.001 | 0.001 | 0.002 | 0.004 |
| 16 | 0.007 | 0.007 | 0.007 | 0.006 | 0.006 | 0.007 | 0.006 | 0.008 | 0.006 | 0.007 | 0.007 | 0.008 | 0.006 | 0.007 | 0.009 |  | 0.002 | 0.001 | 0.002 | 0.002 | 0.004 |
| 17 | 0.009 | 0.008 | 0.008 | 0.007 | 0.008 | 0.009 | 0.008 | 0.010 | 0.007 | 0.009 | 0.008 | 0.009 | 0.008 | 0.010 | 0.009 | 0.009 |  | 0.001 | 0.001 | 0.002 | 0.005 |
| 18 | 0.007 | 0.006 | 0.007 | 0.006 | 0.006 | 0.007 | 0.006 | 0.008 | 0.005 | 0.007 | 0.007 | 0.008 | 0.007 | 0.007 | 0.007 | 0.007 | 0.007 |  | 0.001 | 0.002 | 0.004 |
| 19 | 0.007 | 0.005 | 0.007 | 0.007 | 0.007 | 0.008 | 0.008 | 0.008 | 0.006 | 0.007 | 0.007 | 0.007 | 0.007 | 0.008 | 0.009 | 0.008 | 0.007 | 0.007 |  | 0.002 | 0.005 |
| 20 | 0.009 | 0.012 | 0.011 | 0.010 | 0.010 | 0.009 | 0.008 | 0.011 | 0.011 | 0.012 | 0.008 | 0.010 | 0.010 | 0.013 | 0.015 | 0.012 | 0.014 | 0.012 | 0.013 |  | 0.005 |
| 21 | 0.067 | 0.066 | 0.066 | 0.065 | 0.066 | 0.067 | 0.066 | 0.068 | 0.065 | 0.067 | 0.066 | 0.068 | 0.066 | 0.067 | 0.068 | 0.065 | 0.067 | 0.065 | 0.068 | 0.070 |  |

**Notes**: 1. *A. cerana*, Gangneung, Korea, 2. *A. cerana*, Goseong, Korea, 3. *A. cerana*, Hongcheon, Korea, 4. *A. cerana*, Samcheok, Korea, 5. *A. cerana*, Sancheong, Korea, 6. *A. cerana*, Sangju, Korea, 7. *A. cerana*, Seoul, Korea, 8. *A. cerana*, Icheon, Korea, 9. *A. cerana*, Okcheon, Korea, 10. *A. cerana*, Uisung, Korea, 11. *A. cerana*, Wanju, Korea, 12. *A. cerana*, Hiroshima, Japan, 13. *A. cerana*, Kitahiroshima, Japan, 14. *A. cerana*, Kyoto, Japan, 15. *A. cerana*, Beijing, China, 16. *A. cerana*, Jiangxi, China, 17. *A. cerana*, Taiwan, China, 18. *A. cerana*, Yunnan, China, 19. *A. cerana*, Kathmandu, Nepal, 20. *A. cerana*, Vladivostok, Russia, 21. *A. mellifera*, Out group. * The Korean samples of *A. cerana* are indicated in bold.


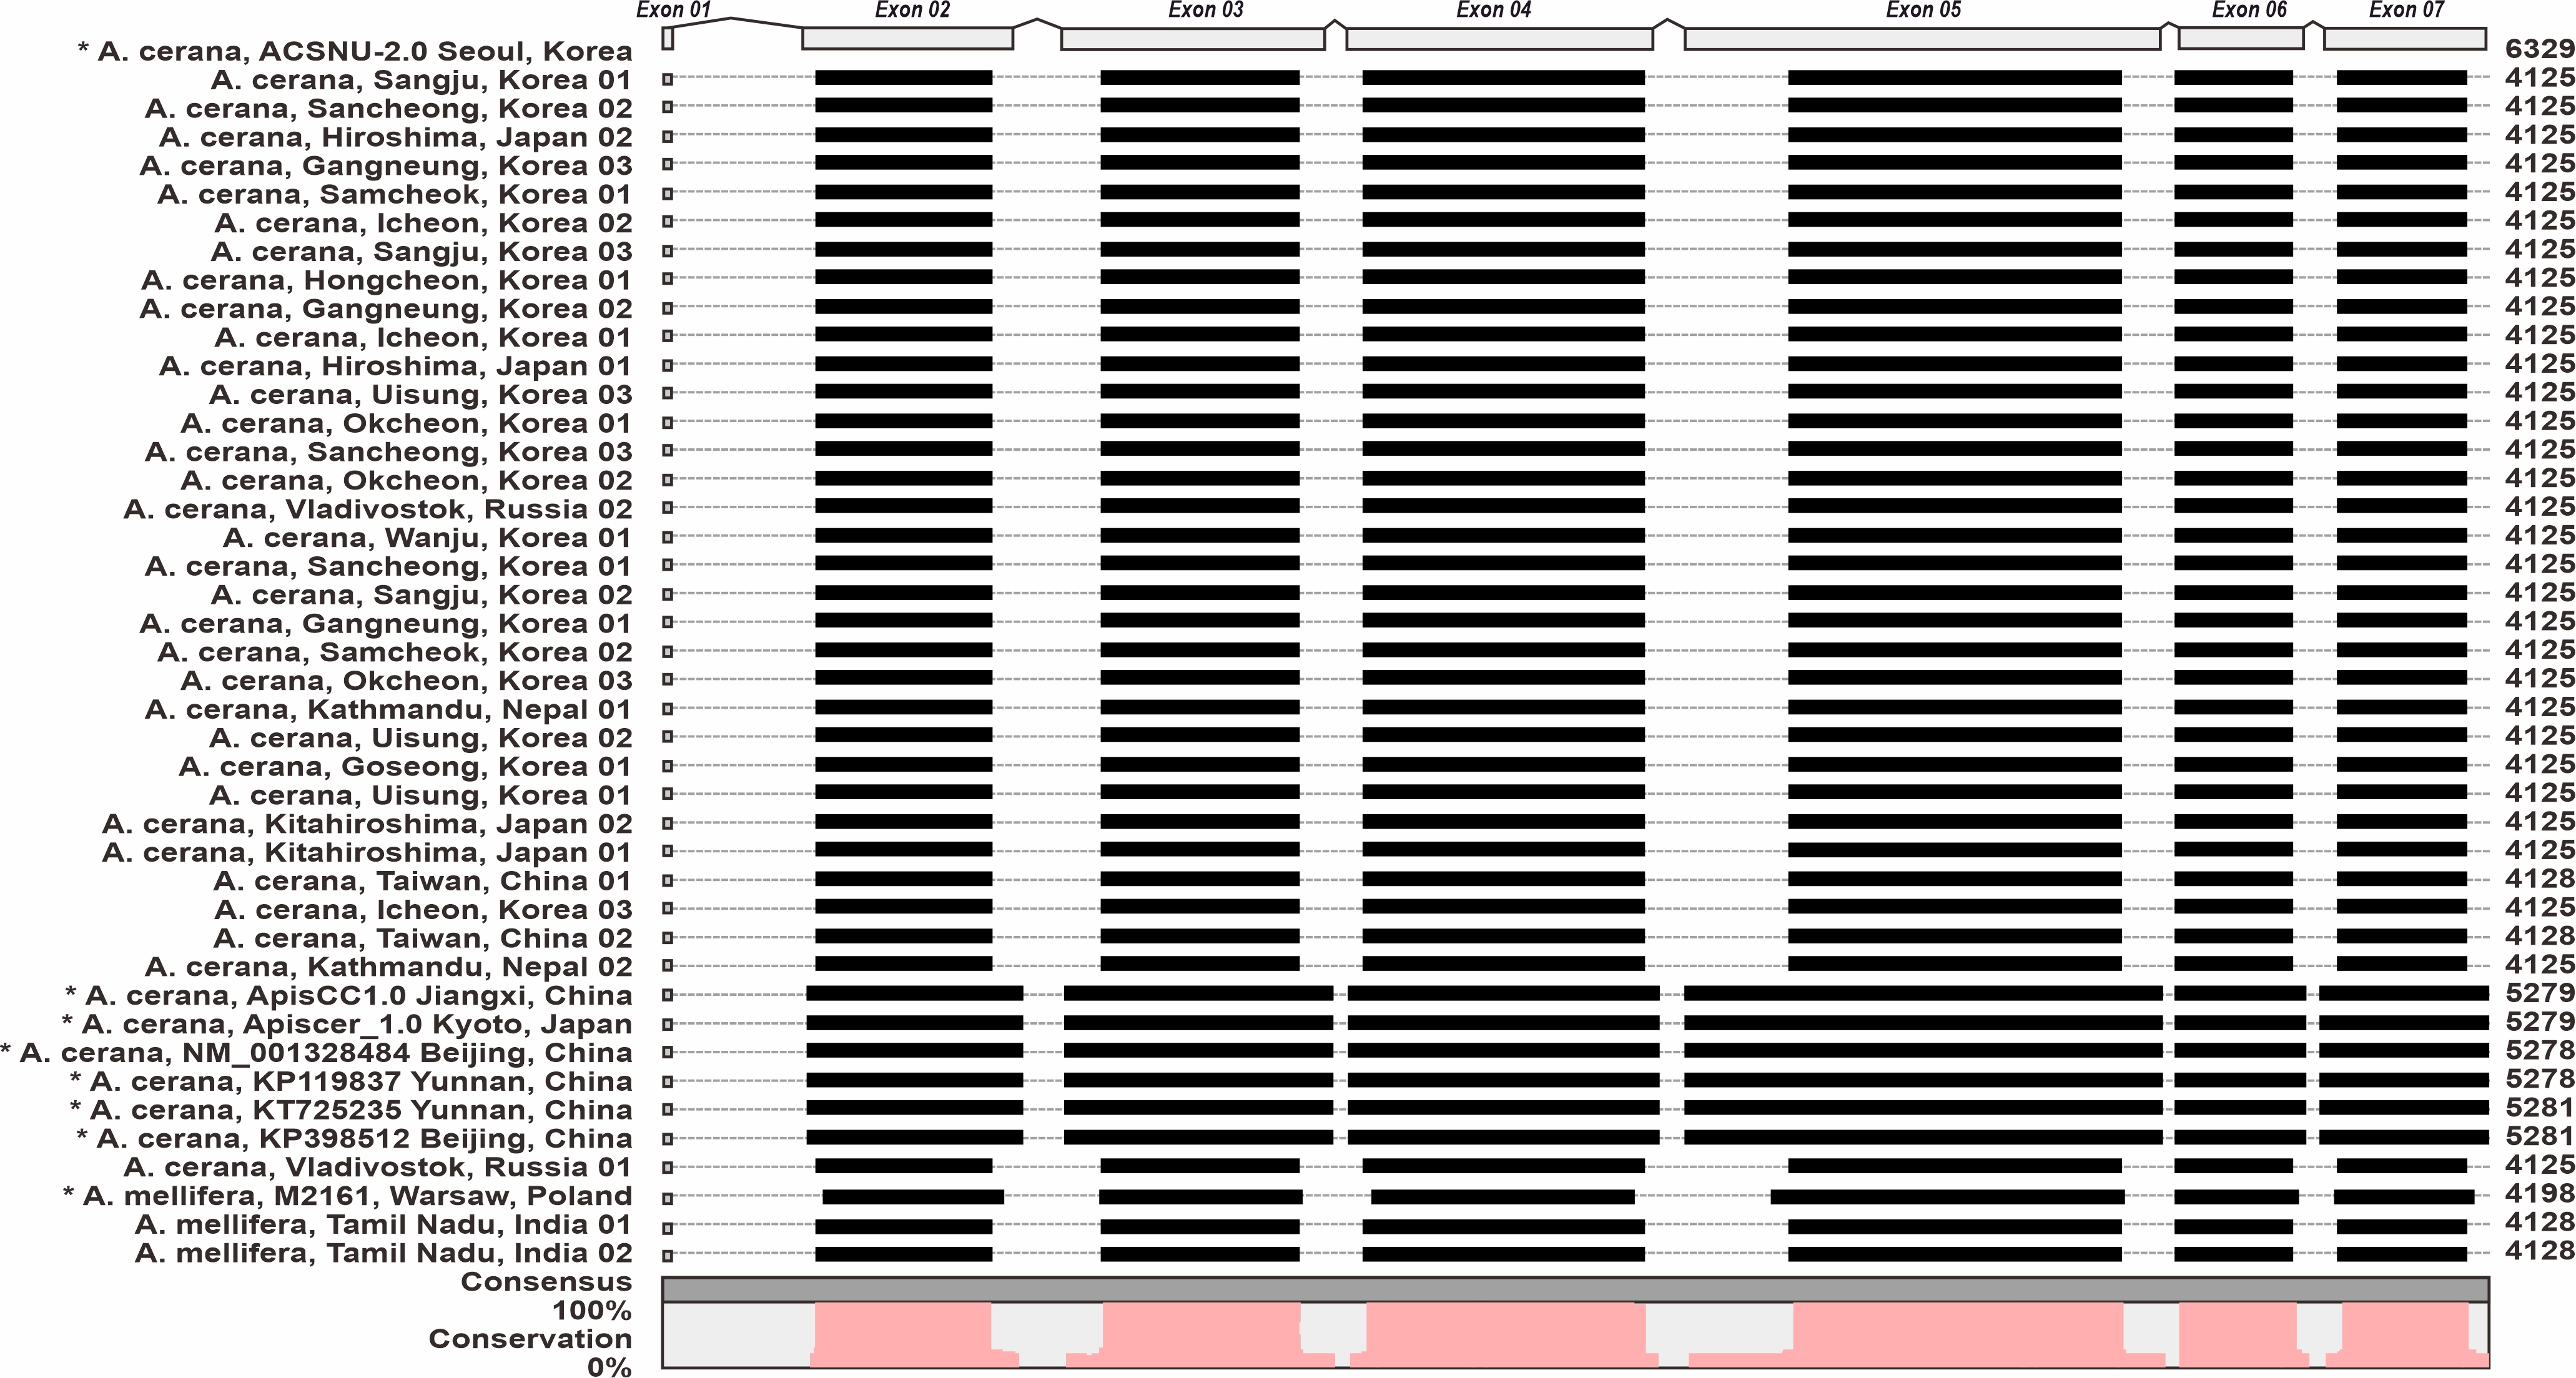


**Figure S1. The aligned** **exons of the gene *VG* of *A. cerana* and outgroup *A. mellifera* samples.**
